# Supplementary material for: Risk of Cardiovascular Disease Events in Patients With Type 2 Diabetes Prescribed the Glucagon-Like Peptide 1 (GLP-1) Receptor Agonist Exenatide Twice Daily or Other Glucose-Lowering Therapies
Source: Oxford University Press journal article supplement (doi:10.2337/dc10-1393), 2010-10-07
Supplement: dc101393onlineappendix.pdf [file dc101393onlineappendix.pdf]

**Supplementary Table 1--Demographics, Other Baseline and Pre-Exposure Characteristics Used in Analysis**

|                                                                                                                                                                                                                                                                                                               |
|---------------------------------------------------------------------------------------------------------------------------------------------------------------------------------------------------------------------------------------------------------------------------------------------------------------|
| <b>Characteristics</b>                                                                                                                                                                                                                                                                                        |
| Age                                                                                                                                                                                                                                                                                                           |
| Gender                                                                                                                                                                                                                                                                                                        |
| Geographic region                                                                                                                                                                                                                                                                                             |
| Health plan type                                                                                                                                                                                                                                                                                              |
| Payer type                                                                                                                                                                                                                                                                                                    |
| Prescribing physician specialty                                                                                                                                                                                                                                                                               |
| Quarter of study entry (2005Q2 – 2009Q1)                                                                                                                                                                                                                                                                      |
| Top 50 primary ICD-9 diagnosis codes for most recent hospitalization pre-exposure                                                                                                                                                                                                                             |
| Top 50 secondary ICD-9 diagnosis codes for most recent hospitalization pre-exposure                                                                                                                                                                                                                           |
| Top 50 procedures (inpatient or outpatient) pre-exposure                                                                                                                                                                                                                                                      |
| Top 50 ICD-9 diagnosis codes for recent physician visit (pre-exposure)                                                                                                                                                                                                                                        |
| Top 50 medications (NDC) pre-exposure                                                                                                                                                                                                                                                                         |
| Health services utilization during pre-exposure period <ul style="list-style-type: none"> <li>• Outpatient visits, outpatient specialist visits, emergency room (ER) visits, hospital admissions, total costs (inpatient, ER, outpatient, pharmacy)</li> </ul>                                                |
| Charlson Comorbidity Index                                                                                                                                                                                                                                                                                    |
| Diabetes Severity Indicators:* <ul style="list-style-type: none"> <li>• Glucose-lowering agents used in pre-exposure period, diabetic retinopathy, diabetic retinopathy, peripheral neuropathy, renal impairment, dialysis</li> </ul>                                                                         |
| Cardiovascular disease indicators:* <ul style="list-style-type: none"> <li>• Acute myocardial infarction, ischemic stroke, coronary revascularization procedure, CHF, ACS, DVT, Arrhythmia / conduction-related events, hyperlipidemia, hypertriglyceridemia, hypertension, ischemic heart disease</li> </ul> |

\*Some of these may also be included in other characteristics (i.e., not mutually exclusive)

Supplementary Table 2--CV Endpoints and Codes Used in Primary Analysis

| <b>Primary CV Endpoints</b>            |                                                                      |
|----------------------------------------|----------------------------------------------------------------------|
| <b>Endpoints:</b>                      | <b>ICD-9-CM Codes (unless noted)</b>                                 |
| Acute myocardial infarction            | 410.xx (excluding 410.7x)                                            |
| Ischemic stroke                        | 433.x1, 434.x1, 435.9, 436, 437.1x, 437.9x                           |
| Coronary revascularization procedures: | (CPT-4 codes)                                                        |
| Angioplasty/atherectomy                | 35450-35459, 35470-35475, 35480-35495                                |
| PTCA/stenting                          | 92980, 92981, 92982, 92984, 92995, 92996, G0290, G0291, S2211, S2222 |
| CABG                                   | 33510-33536, 33572, S2204-S2209                                      |

Supplementary Table 3--Medications, By Drug Class, and Generic Product Index Codes Included In Analysis

| <b>Glucose-Lowering Agents</b>                         |                                   |
|--------------------------------------------------------|-----------------------------------|
| <b>Agents</b>                                          | <b>Generic Product Index Code</b> |
| Exenatide                                              | 2717*                             |
| Insulins                                               | 2710*                             |
| Pramlintide                                            | 2715*                             |
| Sulfonylureas                                          | 2720*                             |
| Metformin                                              | 2725*                             |
| Non-sulfonylurea secretagogues (meglitinide analogues) | 2728*                             |
| $\alpha$ -glucosidase inhibitors                       | 2750*                             |
| Sitagliptin                                            | 2755*                             |
| TZDs                                                   | 2760*                             |
| Sulfonylurea-Metformin                                 | 279970023*,<br>279970024*         |
| TZD-Sulfonylurea                                       | 279978024*,<br>279978026*         |
| TZD-Metformin                                          | 279980024*,<br>279980026*         |
| Sitagliptin-Metformin                                  | 279925027*                        |

**Supplementary Table 4--Other (Non-Glucose-Lowering Medications) and Codes Used in Analysis**

| <i>Other Medications</i>                         |                                                                                                                                                                                                                                       |
|--------------------------------------------------|---------------------------------------------------------------------------------------------------------------------------------------------------------------------------------------------------------------------------------------|
| <b>Drug Class</b>                                | <b>Generic Product Index Code(s)</b>                                                                                                                                                                                                  |
| Antihypertensive agents                          | 33* (beta blockers)<br>34* (calcium channel blockers)<br>36* (antihypertensives)<br>3610* (angiotensin-converting enzyme [ACE] inhibitors)<br>3615* (angiotensin-receptor blockers [ARBs])<br>3640* (vasodilators)<br>37* (diuretics) |
| Antiarrhythmia agents                            | 312000* (cardiotonics, cardiac glycosides)<br>35* (antiarrhythmias)<br>J1160, J1742, J2001, J2690                                                                                                                                     |
| Antihyperlipidemic agents                        | 39*<br>3920* (fibrates)<br>3640* (HMG COA reductase inhibitors [statins])                                                                                                                                                             |
| Antiobesity agents                               | 6125*                                                                                                                                                                                                                                 |
| Antiplatelet agents                              | 6410* (salicylates)<br>8515* (platelet aggregation inhibitors)<br>J0130, J1327, J3246                                                                                                                                                 |
| Nonsteroidal anti-inflammatory drugs (NSAIDs)    | 6610*                                                                                                                                                                                                                                 |
| Lipotropic agents                                | 8040*                                                                                                                                                                                                                                 |
| Anticoagulant or antithrombolytic-related agents | 83* (anticoagulants / heparins)<br>84100010* (hemostatics)<br>85500010* (protamine)<br>8560* (thrombolytic enzymes)<br>J1642, J1644, J1650, J3430, J2995, J3364, J3365, J2720                                                         |
| Immunomodulating medications                     | 9939* (immunomodulators)<br>9940* (immunosuppressive therapy)                                                                                                                                                                         |
